# Supplementary material
Source: publisher site journal article supplement (https://www.dovepress.com/article/589046)
Supplement: Supplementary file 1 [file 589046%20Revised%20%252509Supplementary%20material.doc]

**Title -** Efficacy and safety of peripheral nerve blocks after arthroscopic shoulder surgery: a systematic review and network meta-analysis

**Contents**

[**Section 1. VAS at 12 h 1**](#__RefHeading___Toc50023580)

[**Section 2. VAS at 24 h 6**](#__RefHeading___Toc50023580)

[**Section 3. Morphine consumption within 24 h 11**](#__RefHeading___Toc50023583)

[**Section 4. Hemidiaphragmatic paralysis (HDP) 16**](#__RefHeading___Toc50023584)

[**Section 5. Hoarseness 20**](#__RefHeading___Toc50023585)

[**Section 6. Horner’s syndrome 24**](#__RefHeading___Toc50023586)

[**Section 7. Motor block 2**](#__RefHeading___Toc50023589)**8**

[**Section 8. Postoperative nausea and vomiting (PONV) 32**](#__RefHeading___Toc50023601)

**Section 1. Resting VAS at 12 h**

|  |
| --- |
| **Supplementary Figure 1A. Network map** |

|  |
| --- |
| **Supplementary Figure 1B. Network forest plot** |

|  |
| --- |
| **Supplementary Figure 1C. SUCRA** 1 = CCB(62.0),2 = CPB+SSB(59.8), 3 = Control(99.0), 4 = ESPB(3.4), 5 = ICSB(39.7), 6 = ISPB(62.1), 7 = SANB(13.2), 8 = SCPB(60.2), 9 = SSB(50.6) |

| **Table S1A. Exploration of inconsistency** | | | | | | | |
| --- | --- | --- | --- | --- | --- | --- | --- |
| **Side** | **Direct** | | **Indirect** | | **Difference** | | **P>|z|** |
| **Coef.** | **Std. Err.** | **Coef.** | **Std. Err.** | **Coef.** | **Std. Err.** |
| CCB vs. ICSB | -1.30e-09 | 0.4932751 | 0.025706 | 17.32807 | -.025706 | 17.33509 | 0.999 |
| CPB+SSB vs. SCPB | -1.37e-10 | .547494 | .0000453 | 65.43561 | -.0000453 | 65.43804 | 1.000 |
| Control vs. ESPB | -3.5 | .8428004 | 1.005866 | 1.370737 | -4.505866 | 1.982387 | 0.023 |
| Control vs. ISPB | -1.05319 | .3178556 | -3.305564 | .9387712 | 2.252374 | .9911199 | 0.023 |
| Control vs. SSB | -3.499988 | .8427852 | -1.247024 | .5216891 | -2.252964 | .9911871 | 0.023 |
| ESPB vs. SSB | -1.41e-11 | .2 | 4.50549 | 1.972137 | -4.50549 | 1.982252 | 0.023 |
| ICSB vs. ISPB | .5 | .7575192 | 8.52e-06 | 120.1756 | .4999915 | 120.1789 | 0.997 |
| ISPB vs. SCPB | 2.13e-09 | .6119556 | -.0000219 | 30.89089 | .0000219 | 30.89658 | 1.000 |
| ISPB vs. SSB | -.1939199 | .413694 | -2.445467 | .9004955 | 2.251547 | .9909767 | 0.023 |
| ISPB vs. SSB | 1.3 | .6719721 | -1.255881 | 101.2119 | 2.555881 | 101.2135 | 0.980 |

| **Table S1B. Netleague tables of mixed estimates** | | | | | | | | |
| --- | --- | --- | --- | --- | --- | --- | --- | --- |
| **CCB** |  |  |  |  |  |  |  |  |
| 2.25 (0.31,4.20) | **SSB** |  |  |  |  |  |  |  |
| -0.00 (-0.90,0.90) | -0.19 (-1.34,0.95) | **SCPB** |  |  |  |  |  |  |
| 1.49 (0.17,2.82) | 1.30 (0.32,2.28) | 1.49 (-0.01,3.00) | **SANB** |  |  |  |  |  |
| -0.00 (-0.39,0.39) | -0.19 (-1.00,0.62) | -0.00 (-0.81,0.81) | -1.49 (-2.76,-0.23) | **ISPB** |  |  |  |  |
| 0.50 (-0.75,1.75) | 0.31 (-1.14,1.75) | 0.50 (-0.94,1.94) | -0.99 (-2.73,0.75) | 0.50 (-0.69,1.69) | **ICSB** |  |  |  |
| 2.45 (0.64,4.25) | 2.25 (0.31,4.20) | 2.45 (0.50,4.39) | 0.95 (-1.22,3.13) | 2.45 (0.68,4.21) | 1.95 (-0.18,4.08) | **ESPB** |  |  |
| -1.05 (-1.79,-0.32) | -1.25 (-2.27,-0.22) | -1.05 (-2.07,-0.03) | -2.55 (-3.96,-1.13) | -1.05 (-1.68,-0.43) | -1.55 (-2.90,-0.21) | -3.50 (-5.15,-1.85) | **Control** |  |
| -0.00 (-1.08,1.08) | -0.19 (-1.49,1.10) | 0.00 (-0.61,0.61) | -1.49 (-3.12,0.13) | 0.00 (-1.01,1.01) | -0.50 (-2.06,1.06) | -2.45 (-4.48,-0.41) | 1.05 (-0.13,2.24) | **CPB+SSB** |

**Section 2. Resting VAS at 24 h**

|  |
| --- |
| **Supplementary Figure 2A. Network map** |

|  |
| --- |
| **Supplementary Figure 2B. Network forest plot** |

|  |
| --- |
| **Supplementary Figure 2C. SUCRA** 1 = CCB(68.0),2 = CPB+SSB(30.7), 3 = Control(90.7), 4 = ESPB(84.6), 5 = ICSB(46.3), 6 = ISPB(70.0), 7 = SANB(2.2), 8 = SCPB(39.0), 9 = SSB(41.7), 10 = UTB(26.6) |

| **Table S2A. Exploration of inconsistency** | | | | | | | |
| --- | --- | --- | --- | --- | --- | --- | --- |
| **Side** | **Direct** | | **Indirect** | | **Difference** | | **P>|z|** |
| **Coef.** | **Std. Err.** | **Coef.** | **Std. Err.** | **Coef.** | **Std. Err.** |
| CCB vs. ISPB | 3.76e-08 | .5903163 | .421723 | 15.23274 | -.421723 | 15.24417 | 0.978 |
| CPB+SSB vs. SCPB | .21 | .6172047 | -.5579399 | 55.47499 | .7679399 | 55.47888 | 0.989 |
| Control vs. ESPB | -2.34e-12 | .9617473 | -3.565213 | 2.537439 | 3.565213 | 2.825519 | 0.207 |
| Control vs. ISPB | -.8999976 | .7805969 | .8825522 | 1.177468 | -1.78255 | 1.412712 | 0.207 |
| Control vs. SSB | 8.22e-13 | 1.111287 | -1.782666 | .8723419 | 1.782666 | 1.412777 | 0.207 |
| ESPB vs. SSB | -3.47e-12 | .9617461 | -3.565138 | 2.537372 | 3.565138 | 2.825458 | 0.207 |
| ICSB vs. ISPB | .6 | 1.053297 | .0012375 | 177.1116 | .5987625 | 177.116 | 0.997 |
| ISPB vs. SANB | -2.500003 | .768803 | -1.279202 | .8060627 | -1.220801 | 1.113908 | 0.273 |
| ISPB vs. SCPB | -.2639261 | .4494406 | -.1722855 | 1.678752 | -.0916406 | 1.729361 | 0.958 |
| ISPB vs. SSB | -.5464318 | .4260458 | -1.290278 | .7497374 | .7438461 | .8746151 | 0.395 |
| ISPB vs. UTB | -1.1 | .7322979 | -.0012065 | 167.5818 | -1.098793 | 167.5838 | 0.995 |
| SANB vs. SSB | .7000163 | .6924942 | 1.920295 | .872527 | -1.220278 | 1.113933 | 0.273 |
| SCPB vs. SSB | -.8588522 | .6909735 | -.0518987 | .7207598 | -.8069535 | .9960919 | 0.418 |

| **Table S2B. Netleague tables of mixed estimates** | | | | | | | | | |
| --- | --- | --- | --- | --- | --- | --- | --- | --- | --- |
| **CCB** |  |  |  |  |  |  |  |  |  |
| 0.26 (-1.10,1.61) | **UTB** |  |  |  |  |  |  |  |  |
| 0.75 (-0.37,1.87) | -0.70 (-2.17,0.77) | **SSB** |  |  |  |  |  |  |  |
| -1.25 (-2.58,0.08) | -0.35 (-1.76,1.06) | 0.35 (-0.90,1.60) | **SCPB** |  |  |  |  |  |  |
| 2.50 (1.05,3.94) | 1.40 (-0.28,3.08) | 2.10 (0.56,3.64) | 1.75 (0.26,3.24) | **SANB** |  |  |  |  |  |
| -0.00 (-0.75,0.75) | -1.10 (-2.24,0.04) | -0.40 (-1.33,0.53) | -0.75 (-1.59,0.08) | -2.50 (-3.73,-1.27) | **ISPB** |  |  |  |  |
| 0.60 (-1.41,2.61) | -0.50 (-2.69,1.69) | 0.20 (-1.89,2.29) | -0.15 (-2.20,1.90) | -1.90 (-4.14,0.34) | 0.60 (-1.27,2.47) | **ICSB** |  |  |  |
| -0.90 (-3.16,1.36) | -2.00 (-4.42,0.42) | -1.30 (-3.63,1.03) | -1.65 (-3.94,0.64) | -3.40 (-5.86,-0.94) | -0.90 (-3.03,1.23) | -1.50 (-4.33,1.33) | **ESPB** |  |  |
| -0.90 (-2.39,0.59) | -2.00 (-3.72,-0.28) | -1.30 (-2.89,0.29) | -1.65 (-3.19,-0.11) | -3.40 (-5.18,-1.61) | -0.90 (-2.19,0.39) | -1.50 (-3.77,0.77) | -0.00 (-1.70,1.70) | **Control** |  |
| 0.96 (-0.44,2.36) | -0.14 (-1.78,1.50) | 0.56 (-0.94,2.06) | 0.21 (-0.62,1.04) | -1.54 (-3.24,0.17) | 0.96 (-0.22,2.14) | 0.36 (-1.85,2.57) | 1.86 (-0.58,4.30) | 1.86 (0.11,3.61) | **CPB+SSB** |

**Section 3. Morphine consumption within 24 h**

|  |
| --- |
| **Supplementary Figure 3A. Network map** |

|  |
| --- |
| **Supplementary Figure 3B. Network forest plot** |

|  |
| --- |
| **Supplementary Figure 3C. SUCRA** 1 = CCB(39), 2 = Control(100), 3 = ESPB(85.5), 4 = ICSB(69.4), 5 = ISPB(40.7), 6 = SCPB(28), 7 = SSB(20.3), 8 = UTB(17.1) |

| **Table S3A. Exploration of inconsistency** | | | | | | | |
| --- | --- | --- | --- | --- | --- | --- | --- |
| **Side** | **Direct** | | **Indirect** | | **Difference** | | **P>|z|** |
| **Coef.** | **Std. Err.** | **Coef.** | **Std. Err.** | **Coef.** | **Std. Err.** |
| CCB vs. ISPB | 1.49e-07 | 6.887953 | -7.841712 | 44.07879 | 7.841712 | 44.61371 | 0.860 |
| Control vs. ESPB | -13.1 | 2.12968 | -52.73658 | 9.155771 | 39.63658 | 9.424663 | 0.000 |
| Control vs. ISPB | -30.60006 | 3.44822 | -10.7803 | 3.212018 | -19.81976 | 4.712449 | 0.000 |
| Control vs. SSB | -12.80058 | 2.131114 | -32.59712 | 4.20912 | 19.79653 | 4.717842 | 0.000 |
| ESPB vs. SSB | 0.3000002 | 2.071867 | -39.07298 | 9.165799 | 39.37298 | 9.395769 | 0.000 |
| ICSB vs. ISPB | -6.1 | 7.138079 | -.3634503 | 405.175 | -5.736549 | 405.2296 | 0.989 |
| ISPB vs. SCPB | -.2802031 | 5.220669 | -.0130364 | 484.9179 | -.2671667 | 484.9426 | 1.000 |
| ISPB vs. SSB | -2.012732 | 2.410978 | 17.67261 | 4.043901 | -19.68534 | 4.697956 | 0.000 |
| ISPB vs. UTB | -2.192045 | 4.947356 | 0.3606769 | 285.7363 | -2.552722 | 285.7787 | 0.993 |

| **Table S3B. Netleague tables of mixed estimates** | | | | | | | |
| --- | --- | --- | --- | --- | --- | --- | --- |
| **CCB** |  |  |  |  |  |  |  |
| 2.06 (-4.40,8.52) | **UTB** |  |  |  |  |  |  |
| -19.69 (-28.89,-10.48) | -0.13 (-6.02,5.76) | **SSB** |  |  |  |  |  |
| 1.25 (-5.47,7.96) | -0.94 (-7.27,5.38) | -0.81 (-8.00,6.38) | **SCPB** |  |  |  |  |
| 0.04 (-4.33,4.42) | -2.14 (-5.69,1.40) | -2.01 (-6.74,2.71) | -1.20 (-6.37,3.97) | **ISPB** |  |  |  |
| -6.06 (-13.39,1.28) | -8.24 (-15.11,-1.38) | -8.11 (-15.66,-0.57) | -7.30 (-15.13,0.53) | -6.10 (-11.98,-0.22) | **ICSB** |  |  |
| -17.33 (-26.38,-8.28) | -19.52 (-28.20,-10.84) | -19.39 (-28.60,-10.18) | -18.57 (-28.10,-9.05) | -17.37 (-25.30,-9.45) | -11.27 (-21.15,-1.40) | **ESPB** |  |
| -30.45 (-38.48,-22.42) | -32.64 (-40.26,-25.02) | -32.51 (-40.73,-24.29) | -31.70 (-40.24,-23.15) | -30.49 (-37.24,-23.75) | -24.40 (-33.35,-15.44) | -13.12 (-17.29,-8.95) | **Control** |

**Section 4. Hemidiaphragmatic paralysis (HDP)**

|  |
| --- |
| **Supplementary Figure 4A. Network map** |

|  |
| --- |
| **Supplementary Figure 4B. Network forest plot** |

|  |
| --- |
| **Supplementary Figure 4C. SUCRA** 1 = CCB(48.2), 2 = CPB+SSB(28.1), 3 = ICSB(22.6), 4 = ISPB(94.6), 5 = SCPB(41.7), 6 = UTB(64.8) |

| **Table S4A. Exploration of inconsistency** | | | | | | | |
| --- | --- | --- | --- | --- | --- | --- | --- |
| **Side** | **Direct** | | **Indirect** | | **Difference** | | **P>|z|** |
| **Coef.** | **Std. Err.** | **Coef.** | **Std. Err.** | **Coef.** | **Std. Err.** |
| CCB vs. ISPB | 1.84414 | 1.020065 | .5898122 | 9.136277 | 1.254328 | 9.192944 | 0.891 |
| CPB+SSB vs. SCPB | .8329091 | 1.413959 | -.8980635 | 85.25697 | 1.730973 | 85.26739 | 0.984 |
| ICSB vs. ISPB | 3.583519 | 1.937226 | 5.911081 | 68.26469 | -2.327563 | 68.2637 | 0.973 |
| ISPB vs. SCPB | -2.351101 | 1.501607 | -2.587523 | 34.8515 | .2364218 | 34.87954 | 0.995 |
| ISPB vs. UTB | -1.095203 | .7126502 | -3.860475 | 20.63166 | 2.765272 | 20.64304 | 0.893 |

| **Table S4B. Netleague tables of mixed estimates** | | | | | |
| --- | --- | --- | --- | --- | --- |
| **CCB** |  |  |  |  |  |
| -0.73 (-3.14,1.68) | **UTB** |  |  |  |  |
| 0.52 (-3.02,4.07) | 1.25 (-2.00,4.51) | **SCPB** |  |  |  |
| -1.83 (-3.81,0.15) | -1.10 (-2.49,0.30) | -2.35 (-5.29,0.59) | **ISPB** |  |  |
| 1.76 (-2.53,6.04) | 2.49 (-1.56,6.53) | 1.23 (-3.57,6.03) | 3.58 (-0.21,7.38) | **ICSB** |  |
| 1.36 (-3.14,5.85) | 2.09 (-2.19,6.36) | 0.83 (-1.94,3.60) | 3.18 (-0.85,7.22) | -0.40 (-5.94,5.14) | **CPB+SSB** |

**Section 5. Hoarseness**

|  |
| --- |
| **Supplementary Figure 5A. Network map** |

|  |
| --- |
| **Supplementary Figure 5B. Network forest plot** |

|  |
| --- |
| **Supplementary Figure 5C. SUCRA** 1 = ICSB(30.2), 2 = ISPB(63.7), 3 = ISPB+ICPB(94.8), 4 = SCPB(44.9), 5 = SSB(32.5), 6 = UTB(34.0) |

| **Table S5A. Exploration of inconsistency** | | | | | | | |
| --- | --- | --- | --- | --- | --- | --- | --- |
| **Side** | **Direct** | | **Indirect** | | **Difference** | | **P>|z|** |
| **Coef.** | **Std. Err.** | **Coef.** | **Std. Err.** | **Coef.** | **Std. Err.** |
| ICSB vs. ISPB | 1.386294 | 1.637394 | -.2536985 | 28.54909 | 1.639993 | 28.59601 | 0.954 |
| ISPB vs. ISPB+ICPB | 1.504077 | .7224739 | -3.288 | 85.3319 | 4.792077 | 85.33723 | 0.955 |
| ISPB vs. SCPB | -.2918476 | .5548773 | -1.823429 | 2.486575 | 1.531582 | 2.549333 | 0.548 |
| ISPB vs. SSB | -1.062419 | .5568607 | -2.931845 | 1.249983 | 1.869426 | 1.336442 | 0.162 |
| ISPB vs. UTB | -.8391374 | .7399435 | 1.656555 | 1.616467 | -2.495693 | 1.774377 | 0.160 |
| SCPB vs. SSB | -.9959924 | .9103403 | -1.232109 | 1.38565 | .2361166 | 1.657855 | 0.887 |
| SSB vs. UTB | 2.766481 | 1.516162 | .2699192 | .9221728 | 2.496562 | 1.774587 | 0.159 |

| **Table S5B. Netleague tables of mixed estimates** | | | | | |
| --- | --- | --- | --- | --- | --- |
| **ICSB** |  |  |  |  |  |
| 0.03 (-3.28,3.35) | **UTB** |  |  |  |  |
| -0.85 (-4.86,3.17) | 0.11 (-2.65,2.88) | **SSB** |  |  |  |
| -0.46 (-3.18,2.26) | -0.38 (-3.06,2.29) | -0.50 (-3.30,2.31) | **SCPB** |  |  |
| -2.88 (-6.97,1.21) | -2.42 (-5.18,0.35) | -2.53 (-5.45,0.38) | -2.04 (-4.85,0.77) | **ISPB+ICPB** |  |
| -1.38 (-4.91,2.15) | -0.92 (-2.76,0.93) | -1.03 (-3.09,1.03) | -0.53 (-2.44,1.38) | 1.50 (-0.56,3.56) | **ISPB** |

**Section 6. Horner’s syndrome**

|  |
| --- |
| **Supplementary Figure 6A. Network map** |

|  |
| --- |
| **Supplementary Figure 6B. Network forest plot** |

|  |
| --- |
| **Supplementary Figure 6C. SUCRA** 1 = Control(47.0), 2 = ICSB(30.3), 3 = ISPB(93.1), 4 = ISPB+ICPB(66.9), 5 = SCPB(49.6), 6 = SSB(46.4), 7 = UTB(16.7) |

| **Table S6A. Exploration of inconsistency** | | | | | | | |
| --- | --- | --- | --- | --- | --- | --- | --- |
| **Side** | **Direct** | | **Indirect** | | **Difference** | | **P>|z|** |
| **Coef.** | **Std. Err.** | **Coef.** | **Std. Err.** | **Coef.** | **Std. Err.** |
| Control vs. ISPB | 1.386294 | 1.676979 | .4614832 | 23.51813 | .9248112 | 23.57784 | 0.969 |
| ICSB vs. ISPB | 2.079442 | 1.600611 | 3.692518 | 177.6794 | -1.613076 | 177.6767 | 0.993 |
| ISPB vs. ISPB+ICPB | -.6931472 | .9205734 | -2.882055 | 153.5251 | 2.188908 | 153.5267 | 0.989 |
| ISPB vs. SCPB | -.8666118 | .4538263 | -3.015648 | 2.482886 | 2.149036 | 2.534404 | 0.396 |
| ISPB vs. SSB | -1.407179 | .4305411 | -3.783044 | .7834421 | 2.375865 | .7764858 | 0.002 |
| ISPB vs. UTB | -2.484759 | 1.125125 | 1.579236 | 1.610498 | -4.063995 | 1.964554 | 0.039 |
| SCPB vs. SSB | -1.186434 | .9303805 | -.8442438 | 1.210756 | -.3421904 | 1.524075 | 0.822 |
| SSB vs. UTB | 3.171964 | 1.51178 | -.8928259 | 1.254794 | 4.06479 | 1.964694 | 0.039 |

| **Table S6B. Netleague tables of mixed estimates** | | | | | | |
| --- | --- | --- | --- | --- | --- | --- |
| **Control** |  |  |  |  |  |  |
| 0.34 (-2.02,2.70) | **UTB** |  |  |  |  |  |
| -0.19 (-3.28,2.89) | -1.20 (-3.42,1.01) | **SSB** |  |  |  |  |
| -1.00 (-1.83,-0.18) | -1.30 (-3.39,0.79) | -0.09 (-1.19,1.00) | **SCPB** |  |  |  |
| -0.69 (-3.98,2.61) | -1.79 (-4.18,0.60) | -0.59 (-2.18,1.00) | -0.49 (-1.91,0.92) | **ISPB+ICPB** |  |  |
| -1.38 (-4.41,1.65) | -2.48 (-4.49,-0.48) | -1.28 (-2.21,-0.35) | -1.19 (-1.77,-0.61) | -0.69 (-1.99,0.60) | **ISPB** |  |
| 0.70 (-3.48,4.87) | -0.41 (-3.91,3.10) | 0.80 (-2.22,3.82) | 0.89 (-2.04,3.82) | 1.39 (-1.77,4.54) | 2.08 (-0.79,4.95) | **ICSB** |

**Section 7. Motor block**

|  |
| --- |
| **Supplementary Figure 7A. Network map** |

|  |
| --- |
| **Supplementary Figure 7B. Network forest plot** |

|  |
| --- |
| **Supplementary Figure 7C. SUCRA** 1 = Control(26.5), 2 = ISPB(93.1), 3 = SANB(64.8), 4 = SSB(4.5), 5 = UTB(61.0) |

| **Table S7A. Exploration of inconsistency** | | | | | | | |
| --- | --- | --- | --- | --- | --- | --- | --- |
| **Side** | **Direct** | | **Indirect** | | **Difference** | | **P>|z|** |
| **Coef.** | **Std. Err.** | **Coef.** | **Std. Err.** | **Coef.** | **Std. Err.** |
| Control vs. ISPB | 3.020425 | 1.366466 | .4034008 | 7.636157 | 2.617024 | 7.757456 | 0.736 |
| ISPB vs. SANB | -.7792276 | .7203077 | -6.062697 | 15.75526 | 5.28347 | 15.77135 | 0.738 |
| ISPB vs. UTB | -.9849169 | .926378 | -2.778498 | 49.525 | 1.793581 | 49.53335 | 0.971 |
| SSB vs. UTB | 3.731591 | 1.182684 | 6.309429 | 106.3773 | -2.577838 | 106.3793 | 0.981 |

| **Table S7B. Netleague tables of mixed estimates** | | | | |
| --- | --- | --- | --- | --- |
| **Control** |  |  |  |  |
| -1.95 (-5.16,1.25) | **UTB** |  |  |  |
| 1.78 (-2.18,5.73) | 3.73 (1.41,6.05) | **SSB** |  |  |
| -2.15 (-5.13,0.82) | -0.20 (-2.46,2.06) | -3.93 (-7.17,-0.69) | **SANB** |  |
| -2.94 (-5.57,-0.31) | -0.99 (-2.80,0.83) | -4.72 (-7.66,-1.77) | -0.79 (-2.19,0.61) | **ISPB** |

**Section 8. Postoperative nausea and vomiting (PONV)**

|  |
| --- |
| **Supplementary Figure 8A. Network map** |

|  |
| --- |
| **Supplementary Figure 8B. Network forest plot** |

|  |
| --- |
| **Supplementary Figure 8C. SUCRA** 1 = CPB+SSB(51.1), 2 = Control(66.5), 3 = ESPB(21.7), 4 = ICSB(75.6), 5 = ISPB(44.2), 6 = SANB(32.2), 7 = SCPB(54.0), 8 = SSB(27.7), 9 = UTB(77.1) |

| **Table S8A. Exploration of inconsistency** | | | | | | | |
| --- | --- | --- | --- | --- | --- | --- | --- |
| **Side** | **Direct** | | **Indirect** | | **Difference** | | **P>|z|** |
| **Coef.** | **Std. Err.** | **Coef.** | **Std. Err.** | **Coef.** | **Std. Err.** |
| CPB+SSB vs. SCPB | .0444518 | .6575103 | -.332038 | 20.65736 | .3764898 | 20.66782 | 0.985 |
| Control vs. ESPB | -1.386294 | .7120461 | -.5357118 | 2.0471 | -.8505825 | 2.048812 | 0.678 |
| Control vs. ISPB | -.6884958 | .6406327 | -1.113633 | .7881309 | .4251376 | 1.024447 | 0.678 |
| Control vs. SSB | -1.098602 | .6508974 | -.6732229 | .7910501 | -.4253791 | 1.024418 | 0.678 |
| ESPB vs. SSB | .2876821 | .8207643 | 1.138528 | 1.921016 | -.8508455 | 2.048729 | 0.678 |
| ICSB vs. ISPB | -1.386294 | 1.58782 | .9713636 | 244.9637 | -2.357658 | 244.975 | 0.992 |
| ISPB vs. SANB | -.5191677 | .4246152 | -.005347 | 1.482332 | -.5138207 | 1.544094 | 0.739 |
| ISPB vs. SCPB | -.513244 | .4936489 | 3.053689 | 1.554823 | -3.566933 | 1.583325 | 0.024 |
| ISPB vs. SSB | .0554306 | .4460573 | -.3854287 | .7450384 | .4408593 | .865752 | 0.611 |
| ISPB vs. UTB | 1.037988 | .7227189 | -.7558325 | 146.503 | 1.79382 | 146.5062 | 0.990 |
| SANB vs. SSB | -1.22e-10 | 1.427329 | .514055 | .5897917 | -.514055 | 1.544384 | 0.739 |
| SCPB vs. SSB | -.67614 | .7989361 | 1.789027 | .905899 | -2.465167 | 1.3519 | 0.068 |

| **Table S8B. Netleague tables of mixed estimates** | | | | | | | | |
| --- | --- | --- | --- | --- | --- | --- | --- | --- |
| **CPB+SSB** |  |  |  |  |  |  |  |  |
| 0.87 (-2.46,4.20) | **UTB** |  |  |  |  |  |  |  |
| -0.38 (-4.58,3.81) | 1.95 (-1.42,5.33) | **SSB** |  |  |  |  |  |  |
| -0.04 (-2.96,2.87) | 1.04 (-1.94,4.01) | -0.92 (-2.52,0.69) | **SCPB** |  |  |  |  |  |
| -0.59 (-3.48,2.31) | 1.95 (-2.37,6.28) | -0.00 (-2.71,2.70) | 0.92 (-2.23,4.06) | **SANB** |  |  |  |  |
| -1.43 (-5.64,2.78) | 1.04 (-0.20,2.28) | -0.92 (-4.06,2.23) | 0.00 (-2.70,2.70) | -0.92 (-5.06,3.23) | **ISPB** |  |  |  |
| 1.16 (-1.24,3.56) | -0.35 (-3.63,2.93) | -2.30 (-6.67,2.07) | -1.39 (-5.45,2.68) | -2.30 (-7.44,2.84) | -1.39 (-4.42,1.65) | **ICSB** |  |  |
| -0.23 (-2.42,1.96) | 2.24 (-1.42,5.90) | 0.29 (-1.13,1.70) | 1.20 (-0.93,3.34) | 0.29 (-2.76,3.34) | 1.20 (-2.24,4.65) | 2.59 (-2.00,7.18) | **ESPB** |  |
| -0.48 (-3.97,3.00) | 0.85 (-2.67,4.38) | -1.10 (-2.12,-0.08) | -0.18 (-2.08,1.72) | -1.10 (-3.99,1.79) | -0.18 (-3.49,3.12) | 1.20 (-3.28,5.69) | -1.39 (-2.55,-0.22) | **Control** |
